# Supplementary material for: Targeted next generation sequencing of Cyclospora cayetanensis mitochondrial genomes from seeded fresh produce and other seeded food samples
Source: PubMed Central journal article supplement — Heliyon. 2022 Nov 13;8(11):e11575. doi: 10.1016/j.heliyon.2022.e11575 (PMC9676520; doi:10.1016/j.heliyon.2022.e11575), 2022-11-13
Supplement: mmc1.pdf [file mmc1.pdf]

[Header]  
 Manifest SER962\_275bp  
 BuildID KP231180.1  
 source BedToManifest1.0

[Probes]

| Target ID   | ULSO Sequence              | DLSO Sequence             |
|-------------|----------------------------|---------------------------|
| AMPL3130407 | TGGATATGATTGTAGATGAGATCTC  | TAGTATGACCGCTACTGCTGGGACT |
| AMPL3130488 | CATGATGCTCCAGTAGCATGTAGGA  | TAAAAACATAAACGAGTTCAGTTGG |
| AMPL3130489 | TACAAGATATGGGATAGGTGACAAT  | CAACCGAAAGACACCTCTCTTAAGA |
| AMPL3130490 | CTGTACCTAGTGGATTACTAGATCC  | TGGTAATACATAACCTAAGAAACCT |
| AMPL3130491 | TGGTACAATTTGTAATGGTGTTACA  | AAAATATGTAACACAGCAAGGATTA |
| AMPL3130493 | CAAGATGTTGCACAATTTCTTGAAG  | TAGCGTAATATGCTAAGAAGTACCA |
| AMPL3130494 | TTGCAGCAGTTAGAATACTAGAATT  | CGTAAGTGTAGTACACTAGTAAGTG |
| AMPL3130495 | ATCCAGAAGAACTTAACTCAAGTCT  | CTTCTTGAGGTAATTGAGCTCCAAC |
| AMPL3130497 | CCTGACCCGAATTCAGAAATTAGTG  | TCTAGCGCTACGATACGTAATCCAG |
| AMPL3130498 | TGTAAATACAATAGCCCATGTAAAT  | ACAACCCAAGCAATTGGTACAAGTA |
| AMPL3130499 | AAATTACACCAAAAGCAGGTAAAAT  | TTTTGCACCATTAGTTACACCTAAT |
| AMPL3130500 | AATAGCAATCATCATTGTAACAGCA  | CTTCTGGATGACCAAAGAACCAGAA |
| AMPL3130501 | TAGTACGAAATGGAAATGAGCAATT  | TCTAGTATCTGTCTCTAGACCTACT |
| AMPL3130502 | GTATAACCAAACATTGAATCTTGGT  | ATCGTGTAAGCAACATCTAGAGCG  |
| AMPL3130503 | TAGAACACATTGTGTTCAAATAAGT  | CCACAAATTAATCCAATTACCGCAC |
| AMPL3130504 | GATGAGCCGACATGGAGGTGTTAAT  | GATAATCAGGAATTCTACGTGGCAT |
| AMPL3130505 | GCTCAAGGAAGATTTGATCCTTTTT  | ATCAGAGCTCCTGAAATTCTACGAC |
| AMPL3130506 | AATCTCTTCAAGGTCTGTCACCATA  | AAGGCGAACATGAACTTCACATGA  |
| AMPL3130507 | CCAAATGTTCAAGGAGTGTATGTAAT | AACCAAATTTCTTTTTCAGGAGCA  |
| AMPL3130508 | ACACTTCCCTTCTCGCCAGTTTTTG  | TTTGACAGCGGTTAACCTTTCCTTT |
| AMPL3130509 | AAACGGAAAGCGTCTGTTGGATTCA  | ACTTTTTGAACCAGCCTGGGATCAT |
| AMPL3130510 | CAGTAACCTTTCGGTTGTTTCCAT   | ACTGCTAACTTTGATGAGGAGGTAT |
| AMPL3130511 | AGCACTAGAAGACATGTGATCTAAT  | AGTTTAACTTATGGAGTCCCTTTTG |
| AMPL3130512 | ATGTAGTACCAACTTCTCTAAAAGT  | GAAGATTGTAATATCGGACCGGACC |
| AMPL3130513 | ACTTACTAGGGTGGAGTCTGTTACA  | AATACAGTGAGCAAGAATGGTGAAA |
| AMPL3130514 | TCCTAAGTACTCACAACTTGGATA   | TAGAATGCTGGTGTATGCACCCAG  |
| AMPL3130515 | CAAGTAATACATGTGAGAAATGTAA  | TAGGGCAATGATTACTAAAGTAAGG |
| AMPL3130517 | TTTACGAGATCCCGTATATTTCTTA  | AGCACCAAGTAATACATGTGAGAAA |
| AMPL3130518 | TCCTATGCTCTATTACATCACAGCT  | TACTAACCAAATAGCTTCTACAAAA |
| AMPL3130519 | GTGTCATTTAAAACTTTTTAACCA   | ACCGGTATTTACGAATCTTATCACC |
| AMPL3130520 | ATGCCACTAGTTGTCTTTATGAATC  | GCTTATCTGGACCGATAGAAGCTGT |
| AMPL3130521 | AATTCCTTGTCGGGTAAATTCCGTC  | TTTGCCTGGAGGTTGTAATGGTCCG |
| AMPL3130522 | GATAAAACATGATAACGAATATTGG  | GTGTAACGACTTTCCTAATGTCTCT |
| AMPL3130523 | GATGGATGCTTTGGTAGTATAGCCT  | AAGGTTCCCGTGAGGATAGAAATGA |
| AMPL3130524 | CTTCAAAGTAACCATCAAGCCTTA   | TTCGGACAGAAACTACCTAGATAAA |

[Targets]

| TargetA     | TargetB      | Target Number | Chromosome | Start Position | End |
|-------------|--------------|---------------|------------|----------------|-----|
| Position    | Probe Strand | Sequence      |            |                |     |
| AMPL3130407 | AMPL3130407  | 1             | KP231180 6 | 163            | +   |

TTGAAGAGCCGAGTGTATCCATCCATACCAGGCGTAAAAAGCGTTCGTTCTGAAAAGAAACAGATGCCA  
 GGCCAACTGAACTCGTTTATGTTTTTAATGTCTCAAGT

|                                                                                                                                                                                                                                                     |             |   |               |      |   |
|-----------------------------------------------------------------------------------------------------------------------------------------------------------------------------------------------------------------------------------------------------|-------------|---|---------------|------|---|
| AMPL3130488                                                                                                                                                                                                                                         | AMPL3130488 | 1 | KP231180 103  | 363  | + |
| <p>ATGTCTCAAGTGAGATCTCATCTACAATCATATCCATGTCCAATAATATGAATTTCTTTGGAATTTTG<br/> GTTTCTTAGTAGGAATTTCTTTGTTGTTCAAATTGTAACAGGTTTATTACTAGCATCTAGATACTAG<br/> TGAAATGTCACATGCTTTTGCTAGTGTACAGCATATCTTAAGAGAGGTGTCTTTGCGTTGGAATTTAGA<br/> T</p>              |             |   |               |      |   |
| AMPL3130489                                                                                                                                                                                                                                         | AMPL3130489 | 1 | KP231180 303  | 571  | + |
| <p>GGAATTTAGATTCTACATGCTACTGGAGCATCATGTGTATTCTTATGCTTATTTCTACATATTTTAAGA<br/> GCTCTGGTATTTAGTAGTTATACATATCTAAGTCTAACATGGATTACAGGATTAATTATTTATTTTCTCT<br/> CAATTGCTACAGGTTTCTTAGGTTATGTATTACCATGGGGTCAAATGAGCTTTTGGGGTGCTACTGTAAT<br/> TTGTAATTT</p> |             |   |               |      |   |
| AMPL3130490                                                                                                                                                                                                                                         | AMPL3130490 | 1 | KP231180 478  | 722  | + |
| <p>TGGGGTCAAATGAGCTTTTGGGGTGCTACTGTAATTTGTAATTTATTGTCACCTATCCCATATCTTGTA<br/> CATGGTTATTAGGAGGTTTTTATGTAGATAGTCCTACATTA AAAAGATTCTTTGTATTACATTTTGT<br/> ACCATTCTTAGGTCTAATCCTTGCTGTGTACATATTTTCTATCTACATCTAAAT</p>                                  |             |   |               |      |   |
| AMPL3130491                                                                                                                                                                                                                                         | AMPL3130491 | 1 | KP231180 657  | 895  | + |
| <p>CTATCTACATCTAAATGGATCTAGTAATCCACTAGGTACAGAACTGCTTTAAAATACTTTCTATCCT<br/> CATATGTTAAGTACAGATGGAAAAGGATTTAACTATTTAATCTTATTTCTATTAGCTCAATCATTCTTTG<br/> GTTTACTAGAATTATCACATCCAGATAATAGTATTCCTGTAATAGATT</p>                                        |             |   |               |      |   |
| AMPL3130493                                                                                                                                                                                                                                         | AMPL3130493 | 1 | KP231180 899  | 1071 | + |
| <p>TCTTAAAAGTTATTCCAAGTAAAAGTGGAGGTCTATTAGTATTTGCTGGTAGTATTTTACTATTACT<br/> GTTAAGTGAAGTTCGTTCACTTACTAGTGTACTACACTTACGTCAACAATTCT</p>                                                                                                               |             |   |               |      |   |
| AMPL3130494                                                                                                                                                                                                                                         | AMPL3130494 | 1 | KP231180 1011 | 1275 | + |
| <p>TCAACAATTCTCTTCAAGAAATTGTGCAACATCTTGGAGTATTATTTATTTATATTCATTTATTGCTCTT<br/> ATTATTGTTGGAGCTCAATTACCTCAAGAAGTATTCATTTCTTATGGTAGATTCTTTACCGTAATCTATC<br/> TTTTAAGTACATTTAGCTTATTTAGACTATAAGACTATAGTTAGTTATTACAAAAAATTTCAACAATTAT<br/> ATACT</p>    |             |   |               |      |   |
| AMPL3130495                                                                                                                                                                                                                                         | AMPL3130495 | 1 | KP231180 1112 | 1380 | + |
| <p>TATTCATTTCTTATGGTAGATTCTTTACCGTAATCTATCTTTAAGTACATTTAGCTTATTTAGACTATA<br/> AGACTATAGTTAGTTATTACAAAAAATTTCAACAATTATATACTAATTCTAGTATTCTAACTGCTGCAAA<br/> CCATAAAGAATTAGGTATTTACTATGTATGGTTGCTTTCTTATTTTCAATTGTAGGTACATTACTATCA<br/> GTATTAATT</p>  |             |   |               |      |   |
| AMPL3130497                                                                                                                                                                                                                                         | AMPL3130497 | 1 | KP231180 1375 | 1621 | + |
| <p>AAATCAAAAATTTCTATAACCTAGCATTTACACTACACGGTGCTATTATGATTTTCTTTGTAGTTATGCCA<br/> GGTCTATATGGTGGATATGGTAACTACTTCTTACCAATTTATTTAGGAGCTTCAGAAGTAGCTTTTCTA<br/> GAGTAAATTGTGTATCATTATTACTTGTACCAATTGCTTGGGTTGTAGTAAGTACAT</p>                            |             |   |               |      |   |
| AMPL3130498                                                                                                                                                                                                                                         | AMPL3130498 | 1 | KP231180 1561 | 1826 | + |
| <p>AGTAAGTACATCACTAATTTCTGAATTCGGGTCAGGTATTGGTTGGACTATATCCTCCATTAAGTACA<br/> TCATTAATGTCATTATCTCCAACCTTCAGTAGATTTAATTGTATTTGGTTTAGCTCTTGGCGGTATTTCTA<br/> GCTTTTTATCTTCCGTAAATTTCTTAACAACCTATTGCTGTATTAGGTGTAACCTAATGGTGCAAAACCATG<br/> GTGTTT</p>  |             |   |               |      |   |
| AMPL3130499                                                                                                                                                                                                                                         | AMPL3130499 | 1 | KP231180 1766 | 2016 | + |

CCATGGTGTTTATTTACATGGGCTATTGTATTTACAGCCATTATGCTAATTGCTACACTTCCAATTCTTA  
CTGGTGGATTATTAATGTTAGTATTAGATTTACATCTGAATACTCAATTCTACGATGCTGCATTTAATGG  
TGATCCAGTATTATATCAACATTTATTCTGGTTCTTTGGTCATCCAGAAGTTTATATTATT

AMPL3130500          AMPL3130500          1          KP231180 1956          2192          +

TTTATATTATTATTTTACCTGCTTTTGGTGTAAATTTCAAAAACATTATCTACTTCAGCAGGTAAATTAGT  
ATTCGGAGGTCCTGCTATGATTTTAGCGATGGGATGTATTACCATTTTAGGTTTATTAGTATGGGCACAC  
CATATGATGACAGTAGGTCTAGAGACAGATACTAGAGCATATTTCTC

AMPL3130501          AMPL3130501          1          KP231180 2132          2396          +

GCATATTTCTCTGCTGTTACAATGATGATTGCTATTCCTACTGGTACCAAATCTTTAATTGGTTAAGTA  
CTTTTATGGGAAATCCATTCAGTACAATATCATTAGATATTTGGTATGCTTTAAGTTTTATTTTCTTATT  
TACATTAGGAGGTACTACTGGAGTAGTTTTAGGTAACCTCCGCTCTAGATGTTGCTTTACACGATACTTAT  
TATGT

AMPL3130502          AMPL3130502          1          KP231180 2336          2464          +

ACTTATTATGTAATTGCTCATTTCATTTTCGTAATCTCTTGGTGCGGTAATTGGATTAATTTGTGGAT  
ATTTCTATT

AMPL3130503          AMPL3130503          1          KP231180 2404          2643          +

ATATTTCTATTACCAAGATTCAATGTTTGGTTATACAGCTAATGTCTTTACTAGAAAATACATCAGATTCT  
CCATACTTAAAAGTATGGTCAATTGTATTCTTATTAAGTATTTTATTAACATTTATAACCAATGCATCTAT  
TAGGTTTTAATGTTATGCCACGTAGAATTCCTGATTATCCTGACTATGTA

AMPL3130504          AMPL3130504          1          KP231180 2583          2845          +

CTGACTATGTAACCTATTTGAACACAATGTGTTCTATTGGTTCTATTAGTACTGTATTTATTTTATATTC  
CCTAATTTTATAAAAAAAGAGTTGACCGTGAAATCCATACAAAAGATAAAAACGGGAGATACATAAAACATG  
TTACTCTATCGGTAAAAAGGTACGCCGGGGATAACAGGTCGTAGAATTTACAGGAGCTCTGATCCTTGAAT  
TCT

AMPL3130505          AMPL3130505          1          KP231180 2785          3054          +

CCTTGAATTCTATTAACACCTCCATGTGCGCTCATCACACCCTTGTACTTGAAGAAGGTTCAATTAGGAA  
CGAGAGTTCACCGTGATATGTGATACGTGAGCTGGGTTAAGAACGTCTTGAGGCAGTTTGTCCCTATCT  
GCCATTTTAAAAAATGATTGGTTGTATAATTTAAGAACGAAGTATCATGTGAAGTTTCATGTTGCCTTA  
TTTAAACAAA

AMPL3130506          AMPL3130506          1          KP231180 2994          3192          +

ATTTAAACAAAAAAGGATCAAATCTTCCTTGAGCGACTCGTTAGGCAAATAAAAAATTGAGCTATAAC  
GCTATCTTTTATATAAAATATAATGTCTTCGATTTTAAACGGTTTGCTCCTGAAAAAGAAATTTTGGTTTA  
TCTCAAGTT

AMPL3130507          AMPL3130507          1          KP231180 3132          3399          +

TATCTCAAGTTTATGGTGACAGACCTTGAAGAGATTTGGAAAAGTCCTCAATAAAAAAGATACGTTAAAA  
AAACACAGTCGGTGCGAAGTCGAAACAAGGTAGTTGATGGTGAACCAGTGGCTGAACAAAAAATGAGTCT  
TGTTTTCAAATAGATGTATTTTTTTGGCTAGAGTACGTAAGGAAAAGGAAAGGTTAACCGCTGTCAAAAAC  
AAAAACTT

AMPL3130508          AMPL3130508          1          KP231180 3339          3599          +

AACAAAACTTATTACATACACTCCTGAACATTTGGAACATATGGATATAATTTGGTAGTGGAACATTTG

AAATAAAAATTGGCAGCTGGAAGACGGAATCGTTACTAAGCGTCAGGTAGTCCTGGACACTGAATCCATG  
CGTGATCCCAATGGAACGGTCCCTGGCTGAATTTTATGATCCCAGGCTGGTTCAAAAAGTCAAATATTAG  
C

AMPL3130509          AMPL3130509          1          KP231180 3539          3813          +

CAAATATTAGCCAAAACTGGCGAGAAGGGAAGTGTGTTTCTTAGACAAAAATAAGGGAAGTTTAGCCG  
GGAAGTTAGCGTCTAAAAAATATGATATAATTATCGCACAAGCACTCAGCAAGTTAAGAGAATGTATTGA  
CGTGTTAAAAACCGGTTTTTTGTTAGGGTGCCGGGCAGATGTCATAAACTATACCTCCTCATCAAAGTTA  
GCAGTGTCTTACGTT

AMPL3130510          AMPL3130510          1          KP231180 3754          4019          +

GTCTTACGTTTGAATCCAACAGACGCTTCCGTTTTTAACTACACTACGAAATGCCAACTATTCAAAC  
AATCTTCTCACTTCTTATTAATGGAAGCGCTGGTACCTGGGTATCCAATCCAGTGCTCCTAATTCCGCA  
TAGAGACTCAGCCTCAGTCCAACCTTTGTACTGTTTTTACCAAAGGGACTCCATAAGTTAACTGTAGA  
GTCTGAG

AMPL3130511          AMPL3130511          1          KP231180 3959          4220          +

GTAGAGTCGAGATGGAACAACCGGAAAGGTTACTGCATGTCCTAAAAAATTATATAAATTATATTTTTT  
GTA A A A T T C T T T C T G A A T A G A T T T C A T A G A A A A C C T A A A A T C A T C A T G T A T G A T T G A C A T T T A A C C G C T  
A A T T A T G A A T C T T C C A A G A A T T A T T T A A C A T T C T C A G G T C C G G T C C G A T T A C A A T C T T C C A G T T A G A T  
A A

AMPL3130512          AMPL3130512          1          KP231180 4160          4406          +

CAGTTAGATAAATTAGATCACATGTCTTCTAGTGCTTTGAGATTTGACTCAGTTTTTATAAAAAATTTAAT  
GTCAAATTGCTCATATTTAAGAATTTATACTAAAATTTCTTCTTATATGCAACTACCTTAAGATATTTT  
ACAGTTGGTTTTCTATTTTACCATTCTTGCTCACTGTATTAGTATTATTTAATTTT

AMPL3130513          AMPL3130513          1          KP231180 4341          4537          +

AGTATTATTTAATTTTACTTTTAGAGAAGTTGGTACTACATCAGCTTCTCTGGTTTCATCAATTTGTTTA  
GGTGTATTAGTACTGAGTTACTACTATTTGTTAGCTTCTTCTGGGGTGCATACACCAGCATTCTATCTC  
CTAGTTA

AMPL3130514          AMPL3130514          1          KP231180 4477          4738          +

TCTCCTAGTTATGTAACAGACTCCACCCTAGTAAGTCCAAGTGGGTTCTTGTAAGTATCTCTAGTAGAG  
GACTTATTGTAACTATTACATTCTTACTATCTACTGCTAGTGTAATTCTAGGATATGGTATTTTAACTTC  
AGAGAAAGCTATTATACTAAATATCCAAGAGGATTCCTTACTTTAGTAATCATTGCCCTATGTTTTACT  
AG

AMPL3130515          AMPL3130515          1          KP231180 4678          4820          +

TGTTTTACTAGTATCCAAGTTTGTGAGTACTTAGGACTAGCTATTTCTATTAATGATGGAGTATTAGGTA  
CTTACTTACTATGGATTACAGGA

AMPL3130517          AMPL3130517          1          KP231180 4801          5027          +

ATCTTATTATTCTTTACATTCTGGAGAGGTAGTTTACAATATAATGCAAATACACAAATTAGAACATATA  
ATTCTTCTAGTATTCTAGTATTACCTTTACTAGAATCATACACTCTATTATACTGGCATTTTGTAGAAGC  
TATTTGGTTAGTAATTCATTTTACATTCTATACTTTA

AMPL3130518          AMPL3130518          1          KP231180 4954          5176          +

ATTCATTTTACATTCTATACTTTATAAGAAATATACGGGATCTCGTAAACATGCGAACTCACTTGAAC TA  
TAA A A T A C T T C A T A T T G A C T A T G C T G A C T T G A G T A A T G G A A A T C A A A T A G A T T C A G C T A T C C A T G G T G A

TAAGATTCGTAATACCGGTCAATTCAAAAAAT  
AMPL3130519          AMPL3130519          1          KP231180 5114          5370          +

CAATTCAAAAATAGCTGTGATGTAATAGAGCATAGGATAATGCAAAGTATCCCTGACTGGATTATGCAA  
AAACTGATTTTTATGAGAACAGCTTCCAAGCATACATTTGTTAATGTAATAATAGAAATCATATTTTATT  
GCCTGTCAAGTTCCTTTAATGTAGTTATCTCACAGCTTCTATCGGTCCAGATAAGCGATCTCATGTA  
AMPL3130520          AMPL3130520          1          KP231180 5310          5565          +

GATCTCATGTATGGTTAAAAAGTTTTTAAATGACACCAGGCATGCAATACCAAAAAATTTTTAATATATT  
AATTTTTATGCATGGTAAGGTTTAGCGTGACTTTTGAATGAAACTTTGTGCTCCACCGCTAGTCTCTTA  
CCTCTAACATTCCTTACTTGATACTGTACGGACCATTACAACCTCCAGGCAAAGAATTGTCCAC  
AMPL3130521          AMPL3130521          1          KP231180 5505          5777          +

GAATTGTCCACGATTCATAAAGACAAGTAGTGGCATCTCTCTCGATTTCCAGATGGTGAGTTACAAAGAT  
GATTCTCTCCACACTTATTTTTTTGTTTAAAAGGGAAGTAAAGGTGCTCAGGGTCTTACCGTCCGGCCATA  
GGGTTCTCATATTCAGGATATTTCTATTTAAAAAAGTCTTACATTAGAGACATTAGGAAAGTCGTTAC  
ACCATTCATGCAG  
AMPL3130522          AMPL3130522          1          KP231180 5717          5924          +

CATTCATGCAGGACGGAATTTACCCGACAAGGAATTTTGCTACCTTTGGACCGTCAGATTACAGCCGCCG  
TTTACCCTAGTTTTTATATCATGTTGAGTTATCTCTTTCAAGATTATCTATTTCAATTTCTATCCTCACGG  
GAACCTTTCCACGCTCTA  
AMPL3130523          AMPL3130523          1          KP231180 5864          6066          +

TCCACGCTCTACCAATATTCGTTATCATGTTTTATCTCGCGTGACGAGCGGTGTGTTAAGGCAAGTAAA  
GATGCGCCCAAATTTTTAATAACAAAAATTTGGCGGTGTAGAGCATCTTTATCTAGGTAGTTTCTGTCCG  
AAACAATAACCTT  
AMPL3130524          AMPL3130524          1          KP231180 6006          6266          +

ACAATAACCTTAGGCTATACTACCAAGCATCCATCTACAGCTGCGGAACTGTATTTTTATTATTTAAT  
TTTACTATTTTAAATAGTATTATTTATAATAGTATTATTTATAATAGTATTATTTTTAATAGTACTATTT  
TTAATATAAAAAATTTAGTACACCTAGCCAACACGATCCGATTGCTTGGGTATTTTTTTGTGCTACAAAA  
A
